# Supplementary material for: Prenatal exposure to maternal smoking and offspring DNA methylation across the lifecourse: findings from the Avon Longitudinal Study of Parents and Children (ALSPAC)
Source: PubMed Central journal article supplement (PMC4380069; doi:10.1093/hmg/ddu739), 2014-12-30
Supplement: supp_ddu739_ddu739supp_figS1-S7.pdf [file supp_ddu739_ddu739supp_figS1-S7.pdf]

# AHRR

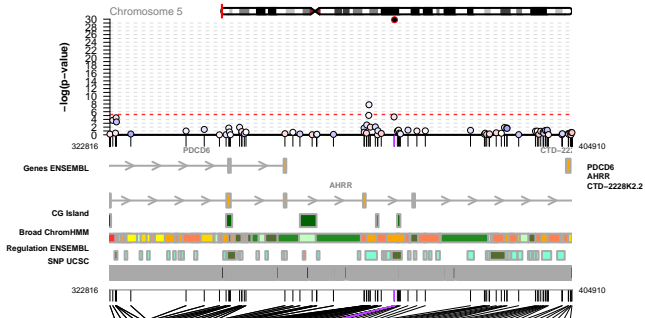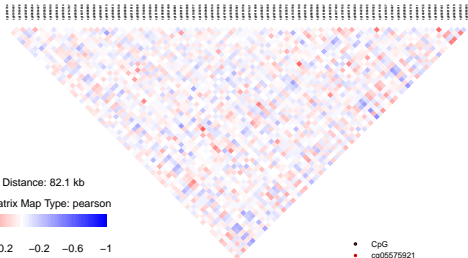

# MYO1G

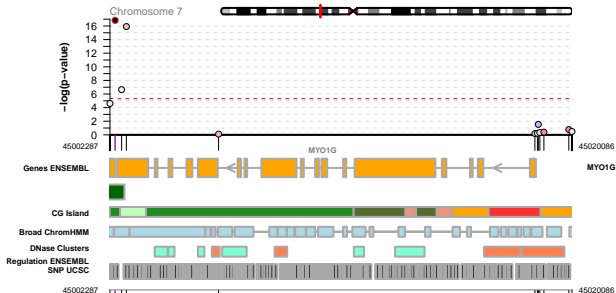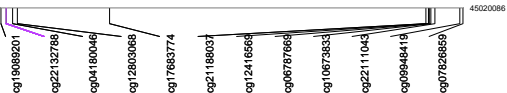

Physical Distance: 17.8 kb

Correlation Matrix Map Type: pearson

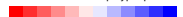

● CpG  
● cg22132788

# GFI1

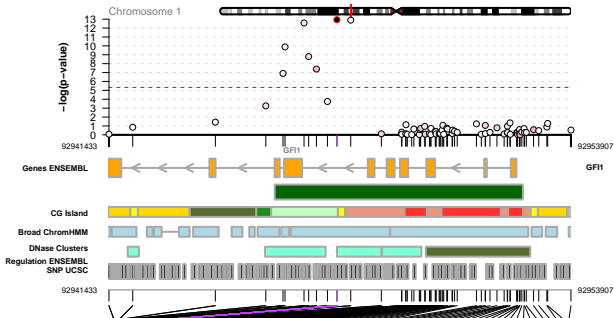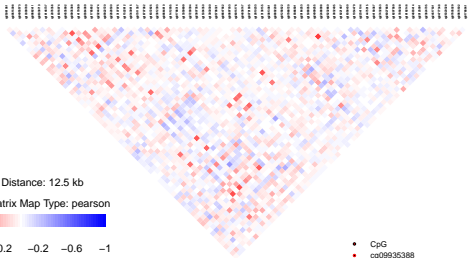

# CYP1A1

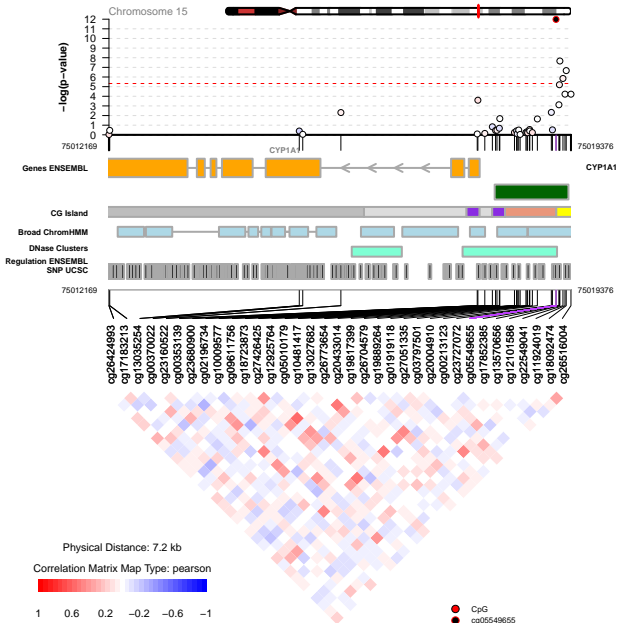

# CNTNAP2

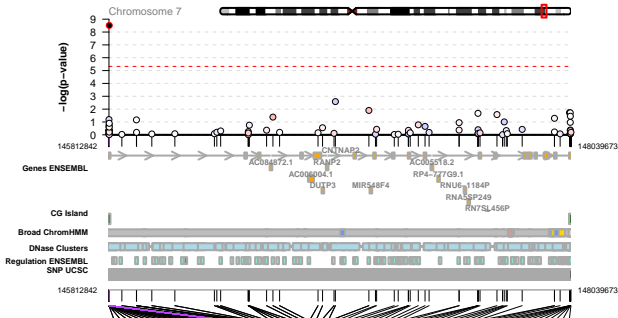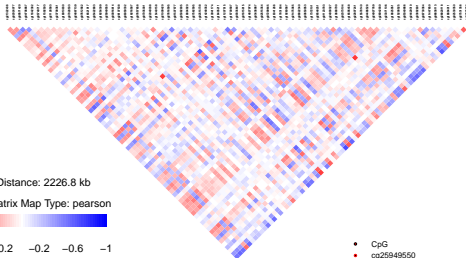

# KLF13

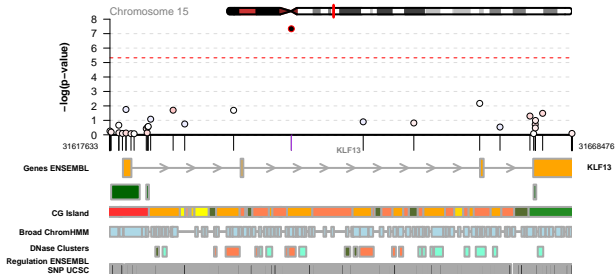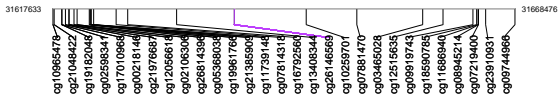

Physical Distance: 50.8 kb

Correlation Matrix Map Type: pearson

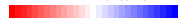

● CpG  
● cg26146569

# ATP9A

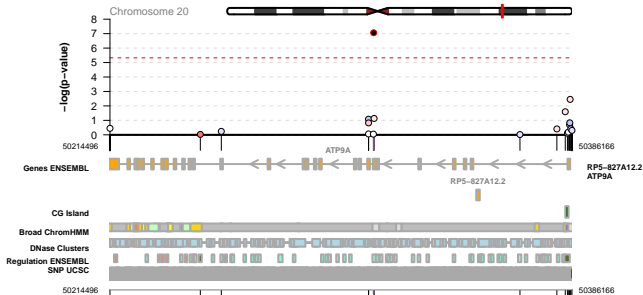

cg00949661  
cg21324456  
cg26048101  
cg24159142  
cg07696884  
cg00877408  
cg20663852  
cg07339236  
cg21380183  
cg00881877  
cg11060393  
cg12109968  
cg17409393  
cg12014753  
cg05264764  
cg01900832  
cg24237813  
cg22048683  
cg05851042

Physical Distance: 171.7 kb

Correlation Matrix Map Type: pearson

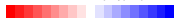

● CpG  
● cg07339236
