# Supplementary material for: Prenatal exposure to maternal smoking and offspring DNA methylation across the lifecourse: findings from the Avon Longitudinal Study of Parents and Children (ALSPAC)
Source: PubMed Central journal article supplement (PMC4380069; doi:10.1093/hmg/ddu739), 2014-12-30

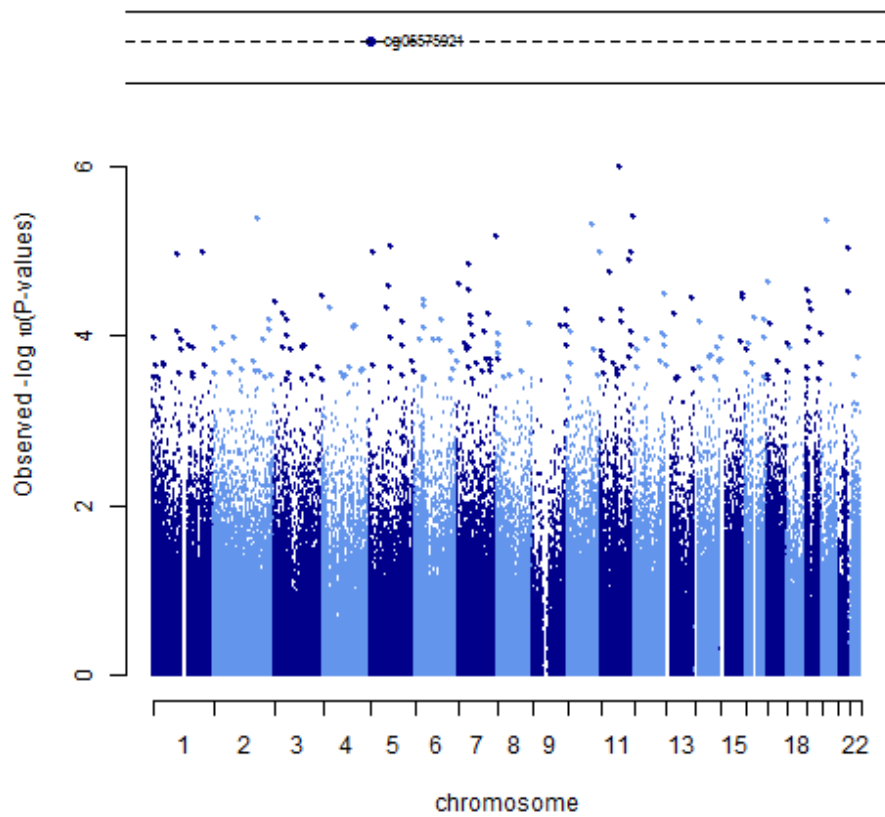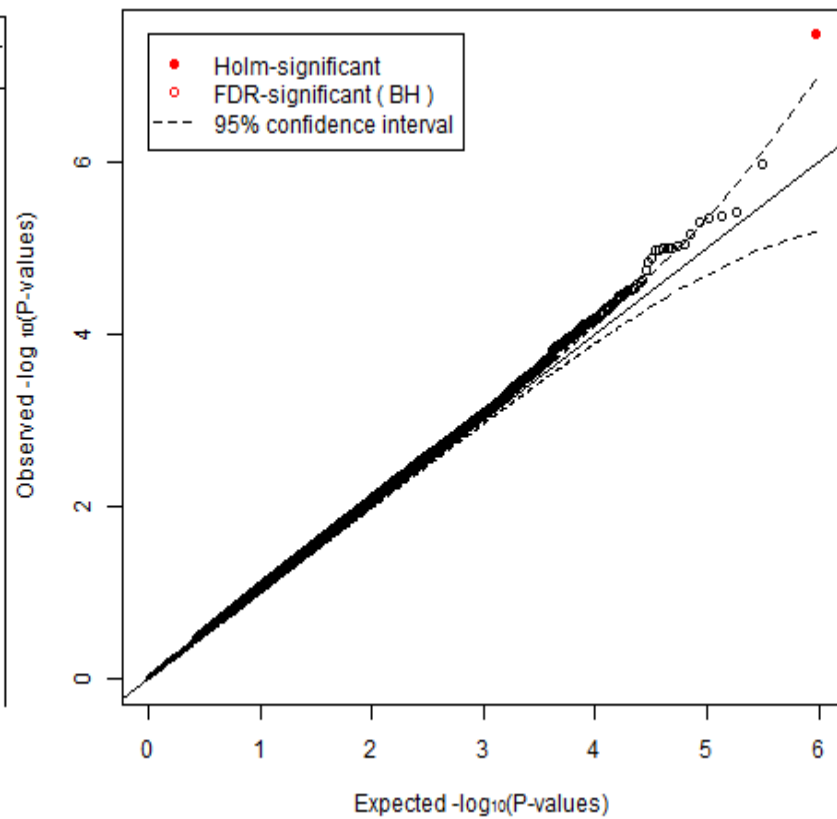

Supplement: supp_ddu739_ddu739supp_figS8.pdf [file supp_ddu739_ddu739supp_figS8.pdf]
